# Supplementary material
Source: PubMed Central journal article supplement (PMC5671487)
Supplement: NIHMS768388-supplement-supplement_1.pdf [file NIHMS768388-supplement-supplement_1.pdf]

- Watson, K.K., Platt, M.L., 2012. Of mice and monkeys: using non-human primate models to bridge mouse- and human-based investigations of autism spectrum disorders. *J. Neurodev. Disord.* 4, 21. doi:10.1186/1866-1955-4-21
- Willette, A.A., Lubach, G.R., Knickmeyer, R.C., Short, S.J., Styner, M., Gilmore, J.H., Coe, C.L., 2011. Brain enlargement and increased behavioral and cytokine reactivity in infant monkeys following acute prenatal endotoxemia. *Behav. Brain Res.* 219, 108–115. doi:10.1016/j.bbr.2010.12.023
- Williams, R.S., Hauser, S.L., Purpura, D.P., DeLong, G.R., Swisher, C.N., 1980. Autism and mental retardation: neuropathologic studies performed in four retarded persons with autistic behavior. *Arch. Neurol.* 37, 749–753.
- Zuckerman, L., Weiner, I., 2003. Post-pubertal emergence of disrupted latent inhibition following prenatal immune activation. *Psychopharmacology (Berl.)* 169, 308–313. doi:10.1007/s00213-003-1461-7
- Zuckerman, L., Weiner, I., 2005. Maternal immune activation leads to behavioral and pharmacological changes in the adult offspring. *J. Psychiatr. Res.* 39, 311–323. doi:10.1016/j.jpsychires.2004.08.008

## Supplementary data

|                                                                                                                                                                                                                                                                                                                                                        | Control<br>Mean ± (SEM) | MIA<br>Mean ± (SEM) |
|--------------------------------------------------------------------------------------------------------------------------------------------------------------------------------------------------------------------------------------------------------------------------------------------------------------------------------------------------------|-------------------------|---------------------|
| $N = \frac{n\pi[(Dr+SI)^2 - (Dr+Sd)^2]}{((\Theta/90) \cdot \pi(Dr+SI)^2) - 2[(Dr+SI)\sin\Theta \cdot (Dr+Sd)]}$ <p>Where<br/> n = visible number of spines in the section of pre-determined length<br/> N = corrected estimate for the true number of spines<br/> Dr = radius of the dendrite<br/> SI = Spine length<br/> Sd = spine head diameter</p> |                         |                     |
| <b>Visible spine count (n)</b>                                                                                                                                                                                                                                                                                                                         | 44.26 (3.20)            | 52.4 (3.87)         |
| <b>Corrected values (N)</b>                                                                                                                                                                                                                                                                                                                            | 111.93 (9.27)           | 123.42 (9.54)       |
| <b>N/n</b>                                                                                                                                                                                                                                                                                                                                             | 2.53                    | 2.36                |

Table S1 Formula to correct for the number of spines obscured by the opaque dendrite trunk. While this did not reveal a significant difference between groups in number of spines per 30µm section of apical dendrite. The greater N/n ratio for the control group demonstrates that the thicker dendrite obscures more spines than the thinner (MIA) dendrites. Because spine length and head diameter were not recorded accurately during data collection these were assumed to be equal between groups and assigned values of 1.0µm and 0.2µm respectively.

Control

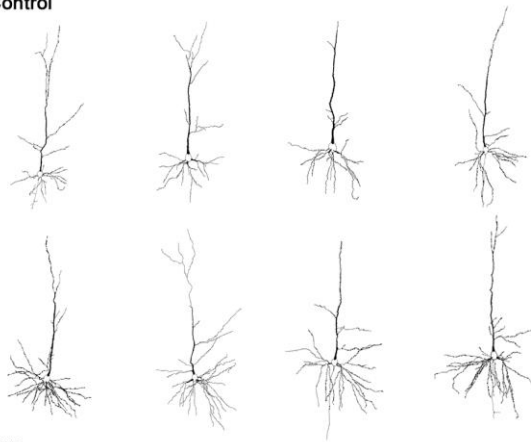

MIA

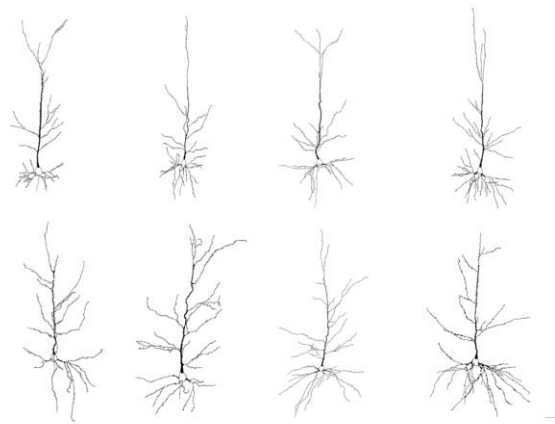

Figure S1 Representative neuron traces of DLPFC neurons from control and MIA treated groups. Neurons from the MIA group have significantly more oblique dendrites protruding from the first 100µm of apical dendrite trunk. Scale bar = 50 µm.
